# Supplementary material
Source: Springer Nature journal article supplement (https://www.springermedizin.de/resource/supplementary/13023_2014_750_MOESM3_ESM.pdf/9642974)
Supplement: MOESM3 [file 9642974]

| <b>Patients</b>             | <b>P1</b>            | <b>P2</b>            | <b>P3</b>         | <b>P4</b>          | <b>pY</b>         |
|-----------------------------|----------------------|----------------------|-------------------|--------------------|-------------------|
| <b>Age</b>                  | 8 months             | 6 months             | 1.5 years         | 2 months           | 5 years           |
| <b>T Lymphocytes</b>        | 1,133 (1,400-11,500) | 3,498 (1,400-11,500) | 2,432 (700-8,800) | 2,336 (2200-9,200) | 1,650 (850-4,300) |
| CD4                         | 177 (1,000-7,200)    | 2,226 (1,000-7,200)  | 1,952 (400-7,200) | 1,440 (1600-6,500) | 1,034 (500-2,700) |
| CD8                         | 942 (200-5,400)      | 954 (200-5,400)      | 384 (200-2,800)   | 672 (300-3,400)    | 594 (9-49)        |
| % Naive CD4                 | 26 (77-97)           | 49 (77-97)           | ND                | 50 (73-100)        | 40 (52-92)        |
| % Naive CD8                 | 4 (31-100)           | 46 (31-100)          | ND                | 75 (47-100)        | 86 (19-100)       |
| <b>T cell proliferation</b> |                      |                      |                   |                    |                   |
| PHA                         | Normal               | Normal               | ND                | Normal             | Normal            |
| <b>B Lymphocytes</b>        |                      |                      |                   |                    |                   |
| CD19+                       | 250 (130-6,300)      | 689 (130-6,300)      | 512 (160-3,700)   | 640 (520-2,300)    | 308 (180-1,300)   |
| %CD19+ CD27+                | 1 (4.3-8.3)          | 2.6 (4.3-8.3)        | 1 (7.5-10.9)      | 1.3 (2.9-4.5)      | 1 (11.1-20.4)     |
| <b>Immunoglobulins</b>      |                      |                      |                   |                    |                   |
| IgG                         | 3.79 (3.35-6.23)     | 2.9 (2.35-4.37)      | 2.87 (4.82-8.96)  | 1.3 (2.95-5.49)    | 0.57 (5.49-10.19) |
| IgA                         | <0.06 (0.27-0.86)    | <0.04 (0.20-0.62)    | <0.05 (0.33-1.22) | 0.21 (0.12-0.38)   | <0.06 (0.41-1.41) |
| IgM                         | <0.06 (0.48-1.36)    | 0.67 (0.34-0.95)     | <0.05 (0.5-1.53)  | <0.1 (0.30-0.85)   | <0.04 (0.54-1.53) |

**Additional File 3.** Immunological status of newly described ICF patients. Lymphocyte counts (/ $\mu$ l) and serum immunoglobulins (g/l) are indicated. Reference intervals for age are indicated into brackets.
